# Supplementary material
Source: PubMed Central journal article supplement (PMC6016679)
Supplement: BPH-175-2869-s001.pdf [file BPH-175-2869-s001.pdf]

### Supplementary figure 1

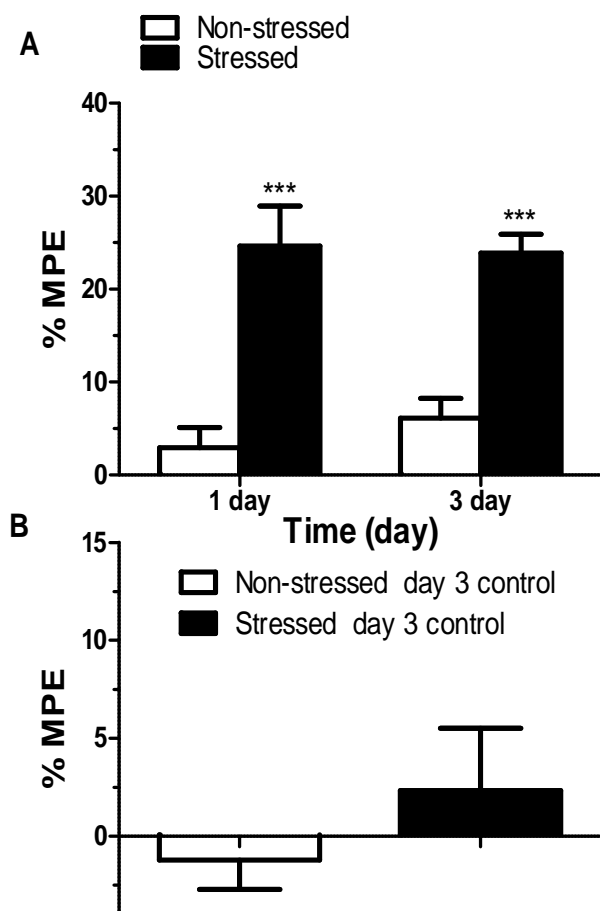

**Supplementary figure 1** (A) Effect of 1 day and 3 day restraint stress (09:00-11:00) on stress-induced analgesia in CD1 male mice. (B) Baseline latency on day 3. Results are expressed as mean  $\pm$  SEM, n=4. \*\*\*p<0.001 as compared to non-stressed controls. Analysis done was repeated measures mixed model analysis using InVivo Stat software.
